# Supplementary material for: Pooled analysis of genome-wide association studies of cervical intraepithelial neoplasia 3 (CIN3) identifies a new susceptibility locus
Source: PubMed Central journal article supplement (PMC5173129; doi:10.18632/oncotarget.9916), 2016-06-07
Supplement: oncotarget-07-42216-s001.pdf [file oncotarget-07-42216-s001.pdf]

## Pooled analysis of genome-wide association studies of cervical intraepithelial neoplasia 3 (CIN3) identifies a new susceptibility locus

### Supplementary Materials

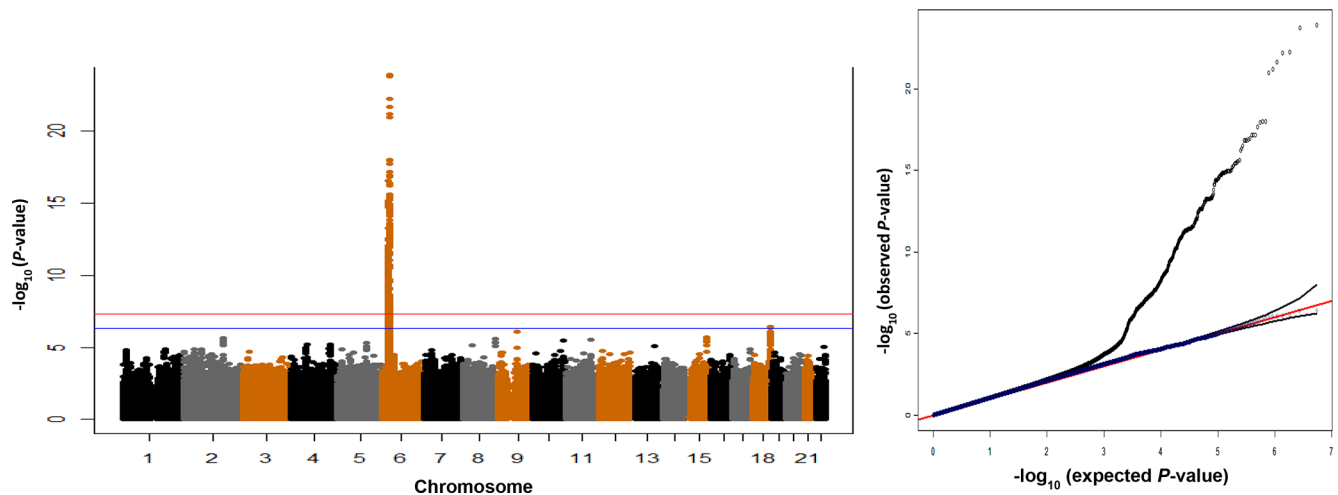

**Supplementary Figure S1: Genome-wide association results for cervical precancer.** (A) Manhattan plot of  $P$  values. The horizontal red line and blue line represent  $P = 5 \times 10^{-8}$  and  $P = 5 \times 10^{-7}$ , respectively. (B) Quantile-quantile plot of the expected versus observed  $-\log_{10}(P\text{ value})$  distribution in the genome-wide association analysis. A quantile-quantile plot of the log-additive model is shown in black ( $\lambda = 1.08$ ) for all the SNPs that pass quality control. Additional quantile-quantile plot, which excludes all SNPs in the extended MHC region of association, is superimposed in blue ( $\lambda = 1.02$ ). The line of equality is indicated in red. The black line surrounding it corresponds to 95% confidence interval which is formed by calculating, for each statistic, the 2.5th and 97.5th centiles of the distribution of the order statistic under random sampling and the null hypothesis. In general, the plotted values fall into the 95% confidence interval, suggesting that there is no significant inflation of the test statistic for the SNPs.

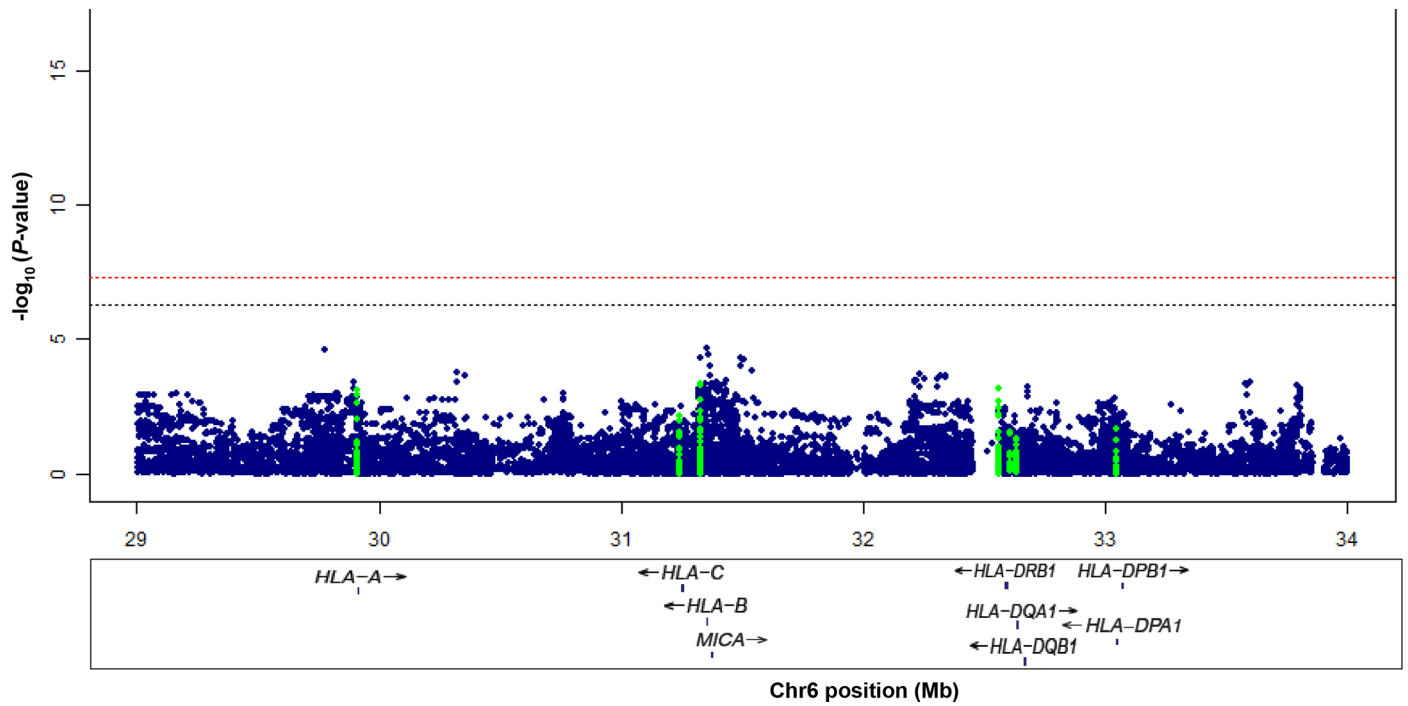

**Supplementary Figure S2: Association results upon conditioning on rs9271898, rs2516448, rs3130196 and rs73730372 at 6p21.3.** The horizontal red line and blue line represent  $P = 5 \times 10^{-8}$  and  $P = 5 \times 10^{-7}$ , respectively.

**Supplementary Table S1: Linkage disequilibrium ( $D'$  and  $r^2$ ) between the top signals**

| $D'$<br>$r^2$     | rs9271898 | rs2516448 | rs3130196 | rs115625939 | <i>B*07:02</i> | <i>B*15:01</i> | <i>C*07:02</i> | <i>DRB1*15:01</i> | <i>DRB1*13:01</i> | <i>DQA1*01:03</i> | <i>DQB1*06:02</i> | <i>DQB1*06:03</i> |
|-------------------|-----------|-----------|-----------|-------------|----------------|----------------|----------------|-------------------|-------------------|-------------------|-------------------|-------------------|
| rs9271898         | —         | 0.020     | 0.050     | 0.940       | 0.483          | 0.329          | 0.481          | 1.0               | 0.982             | 0.937             | 0.985             | 0.903             |
| rs2516448         | 0         | —         | 0.076     | 0.010       | 0.988          | 0.987          | 0.855          | 0.462             | 0.293             | 0.302             | 0.496             | 0.296             |
| rs3130196         | 0         | 0.001     | —         | 0.120       | 0.002          | 0.143          | 0.012          | 0.236             | 0.005             | 0.012             | 0.235             | 0.001             |
| rs115625939       | 0.16      | 0         | 0.010     | —           | 0.411          | 0.052          | 0.475          | 1.0               | 0.989             | 0.962             | 0.941             | 0.941             |
| <i>B*07:02</i>    | 0.039     | 0.172     | 0         | 0.005       | —              | 1.0            | 0.959          | 0.497             | 0.310             | 0.320             | 0.492             | 0.291             |
| <i>B*15:01</i>    | 0.013     | 0.126     | 0         | 0.002       | 0.023          | —              | 1.0            | 0.503             | 0.140             | 0.130             | 0.556             | 0.142             |
| <i>C*07:02</i>    | 0.040     | 0.136     | 0         | 0.007       | 0.872          | 0.024          | —              | 0.466             | 0.334             | 0.344             | 0.479             | 0.317             |
| <i>DRB1*15:01</i> | 0.173     | 0.039     | 0.001     | 0.032       | 0.236          | 0.006          | 0.215          | —                 | —                 | 1.0               | 0.988             | 0.534             |
| <i>DRB1*13:01</i> | 0.090     | 0.007     | 0         | 0.494       | 0.001          | 0.013          | 0.002          | —                 | —                 | 0.992             | 1.0               | 0.988             |
| <i>DQA1*01:03</i> | 0.085     | 0.008     | 0         | 0.480       | 0.002          | 0.012          | 0.002          | 0.016             | 0.958             | —                 | 1.0               | 0.963             |
| <i>DQB1*06:02</i> | 0.163     | 0.044     | 0.001     | 0.027       | 0.239          | 0.007          | 0.220          | 0.947             | 0.015             | 0.016             | —                 | —                 |
| <i>DQB1*06:03</i> | 0.080     | 0.008     | 0         | 0.467       | 0.001          | 0.014          | 0.002          | 0.005             | 0.933             | 0.910             | —                 | —                 |

$D'$  values are given above the diagonal;  $r^2$  values are given below the diagonal.

**Supplementary Table S2: Association results of 4 SNPs at 6p21.3 upon conditioning on significant HLA alleles/haplotypes**

| Loci | SNP         | Single SNP <sup>a</sup> |                       | Conditioning on significant HLA alleles/haplotypes <sup>b</sup> |                       |
|------|-------------|-------------------------|-----------------------|-----------------------------------------------------------------|-----------------------|
|      |             | OR (95%CI)              | $P$                   | OR (95%CI)                                                      | $P$                   |
| 1    | rs9271898   | 0.64 (0.59–0.70)        | $1.2 \times 10^{-24}$ | 0.67 (0.61–0.74)                                                | $1.0 \times 10^{-15}$ |
| 2    | rs2516448   | 1.39 (1.28–1.52)        | $1.1 \times 10^{-15}$ | 1.25 (1.14–1.37)                                                | $6.1 \times 10^{-6}$  |
| 3    | rs3130196   | 1.40 (1.26–1.57)        | $2.3 \times 10^{-9}$  | 1.42 (1.27–1.59)                                                | $1.0 \times 10^{-9}$  |
| 4    | rs115625939 | 0.58 (0.51–0.67)        | $1.4 \times 10^{-15}$ | 0.71 (0.60–0.85)                                                | $1.9 \times 10^{-4}$  |

MAF, minor allele frequency; OR, odds ratio; CI, confidence interval;  $P$ , two-sided  $P$  value corresponding to the OR.

<sup>a</sup>ORs and 95%CIs for minor allele in log-additive model were derived from logistic regression with adjustment for study and one significant principal component generated by principal components analysis.

<sup>b</sup>Derived from logistic regression in log-additive model conditioning on *B\*07:02-C\*07:02*, *B\*15:01*, *DRB1\*13:01-DQA1\*01:03-DQB1\*06:03* and *DRB1\*15:01-DQB1\*06:02* with adjustment for study and one significant principal component generated by principal components analysis.

**Supplementary Table S3: Association results of variants in each bin with risk of cervical precancer**

| Variants    | Position <sup>a</sup> | $r^2$ | Alleles | MAF  |         | Association <sup>b</sup> |                        |
|-------------|-----------------------|-------|---------|------|---------|--------------------------|------------------------|
|             |                       |       |         | Case | Control | OR (95%CI)               | $P$                    |
| bin1        |                       |       |         |      |         |                          |                        |
| rs9271898   | 32595972              | 1.00  | G/A     | 0.38 | 0.49    | 0.64 (0.59–0.70)         | $1.20 \times 10^{-24}$ |
| rs9271897   | 32595954              | 1.00  | G/A     | 0.38 | 0.49    | 0.64 (0.59–0.70)         | $1.65 \times 10^{-24}$ |
| rs9272143   | 32600803              | 0.99  | T/C     | 0.39 | 0.49    | 0.66 (0.61–0.72)         | $4.2 \times 10^{-22}$  |
| rs9272044   | 32598971              | 0.99  | C/A     | 0.39 | 0.48    | 0.66 (0.61–0.72)         | $6.13 \times 10^{-22}$ |
| rs9272067   | 32599401              | 0.98  | C/A     | 0.39 | 0.48    | 0.66 (0.61–0.72)         | $1.04 \times 10^{-21}$ |
| rs116603449 | 32595194              | 0.98  | C/T     | 0.39 | 0.49    | 0.66 (0.61–0.72)         | $5.54 \times 10^{-23}$ |
| rs9272120   | 32600501              | 0.98  | A/G     | 0.39 | 0.49    | 0.66 (0.61–0.72)         | $6.04 \times 10^{-23}$ |
| rs9272130   | 32600638              | 0.97  | A/G     | 0.39 | 0.49    | 0.66 (0.61–0.72)         | $2.12 \times 10^{-22}$ |
| rs9272132   | 32600677              | 0.84  | A/G     | 0.55 | 0.47    | 1.39 (1.28–1.51)         | $2.25 \times 10^{-15}$ |

|             |          |      |     |      |      |                  |                        |
|-------------|----------|------|-----|------|------|------------------|------------------------|
| rs9272114   | 32600317 | 0.83 | T/C | 0.55 | 0.46 | 1.42 (1.31–1.54) | $5.85 \times 10^{-17}$ |
| rs9272043   | 32598946 | 0.82 | T/G | 0.55 | 0.47 | 1.39 (1.28–1.51) | $2.37 \times 10^{-15}$ |
| rs9272105   | 32599999 | 0.81 | G/A | 0.54 | 0.46 | 1.40 (1.29–1.52) | $5.88 \times 10^{-16}$ |
| rs9272254   | 32603098 | 0.81 | C/T | 0.54 | 0.46 | 1.40 (1.29–1.52) | $4.69 \times 10^{-16}$ |
| rs9272070   | 32599485 | 0.81 | T/G | 0.54 | 0.46 | 1.39 (1.28–1.50) | $4.27 \times 10^{-15}$ |
| rs9272229   | 32602568 | 0.81 | C/T | 0.54 | 0.46 | 1.41 (1.30–1.53) | $2.48 \times 10^{-16}$ |
| bin2        |          |      |     |      |      |                  |                        |
| rs2516448   | 31390410 |      | A/G | 0.42 | 0.50 | 0.72 (0.66–0.78) | $1.14 \times 10^{-15}$ |
| rs36002510  | 31388175 | 1.00 | -/T | 0.42 | 0.50 | 0.72 (0.66–0.78) | $1.23 \times 10^{-15}$ |
| rs2596528   | 31385485 | 1.00 | C/T | 0.42 | 0.50 | 0.72 (0.66–0.78) | $1.31 \times 10^{-15}$ |
| rs2596530   | 31387373 | 1.00 | G/A | 0.42 | 0.50 | 0.72 (0.66–0.78) | $1.20 \times 10^{-15}$ |
| rs2596531   | 31387557 | 1.00 | C/T | 0.42 | 0.50 | 0.72 (0.66–0.78) | $1.20 \times 10^{-15}$ |
| rs2853981   | 31378768 | 1.00 | T/C | 0.42 | 0.50 | 0.72 (0.66–0.78) | $1.83 \times 10^{-15}$ |
| rs2853977   | 31379304 | 1.00 | T/A | 0.42 | 0.50 | 0.72 (0.66–0.78) | $1.82 \times 10^{-15}$ |
| rs67841474  | 31380160 | 1.00 | -/G | 0.42 | 0.50 | 0.72 (0.66–0.78) | $1.99 \times 10^{-15}$ |
| rs2256174   | 31380422 | 1.00 | A/G | 0.42 | 0.50 | 0.72 (0.66–0.78) | $1.40 \times 10^{-15}$ |
| rs2256183   | 31380529 | 1.00 | A/G | 0.42 | 0.50 | 0.72 (0.66–0.78) | $1.40 \times 10^{-15}$ |
| rs2844511   | 31389784 | 1.00 | T/C | 0.42 | 0.50 | 0.72 (0.66–0.78) | $1.34 \times 10^{-15}$ |
| rs1882      | 31382911 | 0.90 | A/G | 0.40 | 0.47 | 0.73 (0.67–0.79) | $4.99 \times 10^{-14}$ |
| bin3        |          |      |     |      |      |                  |                        |
| rs3130196   | 33063219 | 1.00 | T/C | 0.17 | 0.13 | 1.40 (1.26–1.57) | $2.29 \times 10^{-9}$  |
| rs3117209   | 33066262 | 1.00 | C/T | 0.17 | 0.13 | 1.40 (1.26–1.57) | $2.84 \times 10^{-9}$  |
| rs3130214   | 33074712 | 1.00 | G/C | 0.17 | 0.13 | 1.40 (1.26–1.57) | $2.85 \times 10^{-9}$  |
| rs3130217   | 33078020 | 1.00 | C/T | 0.17 | 0.13 | 1.39 (1.24–1.56) | $6.83 \times 10^{-9}$  |
| rs3130218   | 33078163 | 1.00 | G/A | 0.17 | 0.13 | 1.39 (1.25–1.56) | $6.10 \times 10^{-9}$  |
| rs3117030   | 33089316 | 0.94 | A/G | 0.16 | 0.12 | 1.38 (1.24–1.55) | $1.49 \times 10^{-9}$  |
| rs3139278   | 33092412 | 0.94 | C/T | 0.16 | 0.12 | 1.38 (1.24–1.55) | $1.60 \times 10^{-8}$  |
| rs146072057 | 33092862 | 0.94 | -/A | 0.16 | 0.12 | 1.38 (1.24–1.55) | $1.56 \times 10^{-8}$  |
| rs3129376   | 33093309 | 0.94 | C/T | 0.16 | 0.12 | 1.38 (1.24–1.55) | $1.60 \times 10^{-8}$  |
| rs9282434   | 33094058 | 0.94 | -/T | 0.16 | 0.12 | 1.38 (1.23–1.54) | $2.07 \times 10^{-8}$  |
| rs3117018   | 33094720 | 0.93 | T/C | 0.16 | 0.12 | 1.38 (1.23–1.54) | $1.91 \times 10^{-8}$  |
| r3117015    | 33095555 | 0.93 | A/T | 0.16 | 0.12 | 1.38 (1.24–1.55) | $1.61 \times 10^{-8}$  |
| rs9277764   | 33095762 | 0.93 | A/G | 0.16 | 0.12 | 1.38 (1.24–1.55) | $1.61 \times 10^{-8}$  |
| rs3129271   | 33096714 | 0.93 | G/C | 0.16 | 0.12 | 1.38 (1.24–1.55) | $1.61 \times 10^{-8}$  |
| rs3117003   | 33096777 | 0.93 | C/T | 0.16 | 0.12 | 1.38 (1.24–1.55) | $1.61 \times 10^{-8}$  |
| rs3116993   | 33098828 | 0.93 | C/T | 0.16 | 0.12 | 1.38 (1.23–1.54) | $2.12 \times 10^{-8}$  |
| rs3129270   | 33097423 | 0.93 | G/A | 0.16 | 0.12 | 1.39 (1.24,1.55) | $1.29 \times 10^{-8}$  |
| rs3116992   | 33099129 | 0.93 | C/T | 0.16 | 0.12 | 1.38 (1.23–1.54) | $2.08 \times 10^{-8}$  |
| rs3130239   | 33101269 | 0.92 | G/A | 0.16 | 0.12 | 1.39 (1.24–1.55) | $1.23 \times 10^{-8}$  |
| rs3129262   | 33102004 | 0.92 | C/T | 0.16 | 0.12 | 1.39 (1.24–1.55) | $1.23 \times 10^{-8}$  |
| rs3116976   | 33111953 | 0.92 | C/T | 0.16 | 0.12 | 1.39 (1.24–1.55) | $1.35 \times 10^{-8}$  |
| rs3129225   | 33113055 | 0.92 | C/G | 0.16 | 0.12 | 1.39 (1.24–1.55) | $1.35 \times 10^{-8}$  |
| rs3116974   | 33114333 | 0.92 | T/C | 0.16 | 0.12 | 1.39 (1.24–1.55) | $1.35 \times 10^{-8}$  |
| rs3116965   | 33120677 | 0.92 | A/G | 0.16 | 0.12 | 1.39 (1.24–1.55) | $1.39 \times 10^{-8}$  |
| rs3116961   | 33124031 | 0.92 | G/A | 0.16 | 0.12 | 1.38 (1.24–1.55) | $1.49 \times 10^{-8}$  |
| rs3130169   | 33048102 | 0.92 | G/A | 0.16 | 0.12 | 1.39 (1.24–1.56) | $1.43 \times 10^{-8}$  |

|             |          |      |       |      |      |                  |                        |
|-------------|----------|------|-------|------|------|------------------|------------------------|
| rs3128959   | 33048380 | 0.92 | G/A   | 0.16 | 0.12 | 1.40 (1.25–1.57) | $1.23 \times 10^{-8}$  |
| rs3097670   | 33046752 | 0.92 | G/C   | 0.16 | 0.12 | 1.39 (1.24–1.56) | $1.46 \times 10^{-8}$  |
| rs3129203   | 33127757 | 0.91 | G/A   | 0.16 | 0.13 | 1.37 (1.23–1.54) | $2.70 \times 10^{-8}$  |
| rs3116989   | 33099538 | 0.87 | A/C   | 0.17 | 0.13 | 1.33 (1.19–1.49) | $3.63 \times 10^{-7}$  |
| rs55954100  | 33099998 | 0.86 | -/A   | 0.17 | 0.13 | 1.33 (1.20–1.49) | $2.92 \times 10^{-7}$  |
| rs2092305   | 33100189 | 0.86 | T/C   | 0.17 | 0.13 | 1.33 (1.20–1.49) | $2.92 \times 10^{-7}$  |
| rs3130161   | 33125858 | 0.86 | A/C   | 0.17 | 0.13 | 1.33 (1.19–1.49) | $3.47 \times 10^{-7}$  |
| rs3130159   | 33124693 | 0.86 | G/C   | 0.17 | 0.13 | 1.33 (1.19–1.48) | $4.61 \times 10^{-7}$  |
| rs2744505   | 33153122 | 0.80 | G/C   | 0.18 | 0.14 | 1.37 (1.23–1.53) | $7.33 \times 10^{-9}$  |
| rs71709900  | 33076147 | 0.80 | -/TCC | 0.19 | 0.15 | 1.34 (1.21–1.49) | $3.61 \times 10^{-8}$  |
| bin4        |          |      |       |      |      |                  |                        |
| rs115625939 | 32583584 | 1.00 | A/G   | 0.09 | 0.15 | 0.58 (0.51–0.66) | $1.39 \times 10^{-15}$ |
| rs73730372  | 32584581 | 1.00 | C/T   | 0.09 | 0.15 | 0.58 (0.51–0.67) | $3.05 \times 10^{-15}$ |
| rs73730377  | 32584880 | 1.00 | A/G   | 0.09 | 0.15 | 0.59 (0.51–0.67) | $3.72 \times 10^{-15}$ |
| rs508318    | 32584894 | 1.00 | C/A   | 0.09 | 0.15 | 0.59 (0.51–0.67) | $3.72 \times 10^{-15}$ |
| rs113016235 | 32584977 | 1.00 | T/G   | 0.09 | 0.15 | 0.59 (0.51–0.67) | $3.72 \times 10^{-15}$ |
| rs113243185 | 32585071 | 1.00 | G/C   | 0.09 | 0.15 | 0.59 (0.52–0.67) | $6.93 \times 10^{-15}$ |
| rs113705304 | 32590453 | 0.96 | C/G   | 0.09 | 0.14 | 0.58 (0.51–0.67) | $3.96 \times 10^{-15}$ |
| rs34831921  | 32590768 | 0.96 | G/T   | 0.09 | 0.14 | 0.58 (0.51–0.67) | $3.96 \times 10^{-15}$ |
| rs34376179  | 32591238 | 0.96 | T/C   | 0.09 | 0.14 | 0.57 (0.50–0.66) | $1.10 \times 10^{-15}$ |
| rs34967069  | 32591248 | 0.96 | G/A   | 0.09 | 0.14 | 0.57 (0.50–0.66) | $1.10 \times 10^{-15}$ |
| rs73728618  | 32591567 | 0.96 | T/A   | 0.09 | 0.14 | 0.57 (0.50–0.66) | $1.10 \times 10^{-15}$ |
| rs35001273  | 32591664 | 0.96 | C/T   | 0.09 | 0.14 | 0.57 (0.50–0.66) | $1.10 \times 10^{-15}$ |
| rs35867827  | 32592068 | 0.93 | A/G   | 0.08 | 0.14 | 0.58 (0.50–0.67) | $1.56 \times 10^{-14}$ |
| rs35224566  | 32592313 | 0.93 | A/G   | 0.08 | 0.14 | 0.57 (0.50–0.66) | $7.58 \times 10^{-15}$ |
| rs34518860  | 32594103 | 0.96 | G/A   | 0.09 | 0.14 | 0.57 (0.50–0.66) | $2.95 \times 10^{-15}$ |
| rs116518618 | 32594998 | 0.96 | C/T   | 0.09 | 0.14 | 0.57 (0.50–0.66) | $1.07 \times 10^{-15}$ |
| rs28584179  | 32626119 | 0.96 | C/T   | 0.08 | 0.14 | 0.57 (0.49–0.65) | $1.77 \times 10^{-15}$ |

MAF, minor allele frequency; OR, odds ratio; CI, confidence interval; *P*, two-sided *P* value corresponding to the OR.

<sup>a</sup>GRCh37/hg19 Assembly.

<sup>b</sup>ORs and 95%CIs for minor allele in log-additive model were derived from logistic regression with adjustment for study and one significant principal component generated by principal components analysis.

#### Supplementary Table S4: Comparison of association results of top signals between CIN3+cervical cancer and CIN3

| SNP         | CIN3+cervical cancer  |                       | CIN3                  |                       |                                       |
|-------------|-----------------------|-----------------------|-----------------------|-----------------------|---------------------------------------|
|             | OR (95%) <sup>a</sup> | <i>P</i> <sup>a</sup> | OR (95%) <sup>a</sup> | <i>P</i> <sup>a</sup> | <i>P</i> <sub>-het</sub> <sup>b</sup> |
| rs9271898   | 0.64 (0.59–0.70)      | $1.2 \times 10^{-24}$ | 0.65 (0.59–0.70)      | $1.3 \times 10^{-23}$ | 0.80                                  |
| rs2516448   | 1.39 (1.28–1.52)      | $1.1 \times 10^{-15}$ | 1.39 (1.28–1.52)      | $1.2 \times 10^{-14}$ | 1.0                                   |
| rs3130196   | 1.40 (1.26–1.57)      | $2.3 \times 10^{-9}$  | 1.43 (1.28–1.60)      | $4.4 \times 10^{-10}$ | 0.79                                  |
| rs115625939 | 0.58 (0.51–0.67)      | $1.4 \times 10^{-15}$ | 0.59 (0.51–0.67)      | $1.7 \times 10^{-14}$ | 0.86                                  |

| <b>HLA-B</b>         |                  |                       |                  |                       |      |
|----------------------|------------------|-----------------------|------------------|-----------------------|------|
| <i>HLA_B*0702</i>    | 1.41 (1.27–1.57) | $1.4 \times 10^{-10}$ | 1.39 (1.25–1.55) | $1.0 \times 10^{-9}$  | 0.85 |
| <i>HLA_B*1501</i>    | 0.67 (0.58–0.77) | $2.6 \times 10^{-8}$  | 0.67 (0.59–0.78) | $9.9 \times 10^{-8}$  | 1.0  |
| <b>HLA-C</b>         |                  |                       |                  |                       |      |
| <i>HLA_C*0702</i>    | 1.37 (1.24–1.52) | $2.6 \times 10^{-9}$  | 1.36 (1.22–1.51) | $1.7 \times 10^{-8}$  | 0.92 |
| <b>HLA-DRB1</b>      |                  |                       |                  |                       |      |
| <i>HLA_DRB1*1301</i> | 0.49 (0.40–0.59) | $1.8 \times 10^{-13}$ | 0.49 (0.40–0.59) | $2.9 \times 10^{-13}$ | 1.0  |
| <i>HLA_DRB1*1501</i> | 1.36 (1.22–1.51) | $9.7 \times 10^{-9}$  | 1.34 (1.21–1.49) | $6.5 \times 10^{-8}$  | 0.85 |
| <b>HLA-DQA1</b>      |                  |                       |                  |                       |      |
| <i>HLA_DQA1*0103</i> | 0.49 (0.40–0.59) | $5.6 \times 10^{-14}$ | 0.48 (0.40–0.58) | $9.8 \times 10^{-14}$ | 0.88 |
| <b>HLA-DQB1</b>      |                  |                       |                  |                       |      |
| <i>HLA_DQB1*0603</i> | 0.54 (0.45–0.64) | $1.5 \times 10^{-11}$ | 0.54 (0.45–0.65) | $2.9 \times 10^{-11}$ | 1.0  |
| <i>HLA_DQB1*0602</i> | 1.32 (1.19–1.47) | $2.5 \times 10^{-7}$  | 1.30 (1.17–1.45) | $1.7 \times 10^{-6}$  | 0.84 |

OR, odds ratio; CI, confidence interval; *P*, two-sided *P* value corresponding to the OR;  $P_{\text{-het}}$ , *P* for heterogeneity.

<sup>a</sup>ORs and 95% CIs for minor allele in log-additive model were derived from logistic regression with adjustment for study and one significant principal component generated by principal components analysis.

<sup>b</sup>*P* for heterogeneity was evaluated using the Cochran Q test statistic.

### Supplementary Table S5: Association of the top hits identified by Chinese GWAS of cervical cancer in the present data

| CHR | SNP        | Position <sup>a</sup> | Nearby gene   | OR(95%CI) <sup>b</sup> | <i>P</i> |
|-----|------------|-----------------------|---------------|------------------------|----------|
| 6   | rs9277952  | 33204274              | <i>HLA-DP</i> | 0.97 (0.83–1.13)       | 0.69     |
| 6   | rs4282438  | 33072172              | <i>HLA-DP</i> | 1.10 (0.88–1.36)       | 0.41     |
| 4   | rs13117307 | 56751740              | <i>EXOC1</i>  | 1.08 (0.98–1.19)       | 0.12     |
| 17  | rs8067378  | 38051348              | <i>GSDMB</i>  | 0.91 (0.83–0.99)       | 0.03     |

OR, odds ratio; CI, confidence interval; *P*, two-sided *P* value corresponding to the OR.

<sup>a</sup>GRCh37/hg19 Assembly.

<sup>b</sup>ORs and 95% CIs for minor allele in log-additive model were derived from logistic regression with adjustment for study and one significant principal component generated by principal components analysis.

### Supplementary Table S6: Exclusion criteria of subjects for GWAS

| Sample                                                          | Cases        | Controls     | Total        |
|-----------------------------------------------------------------|--------------|--------------|--------------|
| All                                                             | 1,650        | 4,454        | 6,104        |
| <b>Exclusion criteria for subjects:</b>                         |              |              |              |
| Unexpected duplicates                                           | 11           | 0            | 11           |
| Unexpected 1 <sup>st</sup> and 2 <sup>nd</sup> degree relatives | 4            | 5            | 9            |
| Population outliers                                             | 1            | 7            | 8            |
| <b>Included in analysis</b>                                     | <b>1,634</b> | <b>4,442</b> | <b>6,076</b> |
